# Supplementary material
Source: publisher site journal article supplement (https://www.dovepress.com/article/384333)
Supplement: Supplementary file 1 [file get_supplementary_file.php]

**Supplementary Figure 1**. Summary of the steps for the translation and cultural adaptation process (according to the ISPOR recommended stepsa)


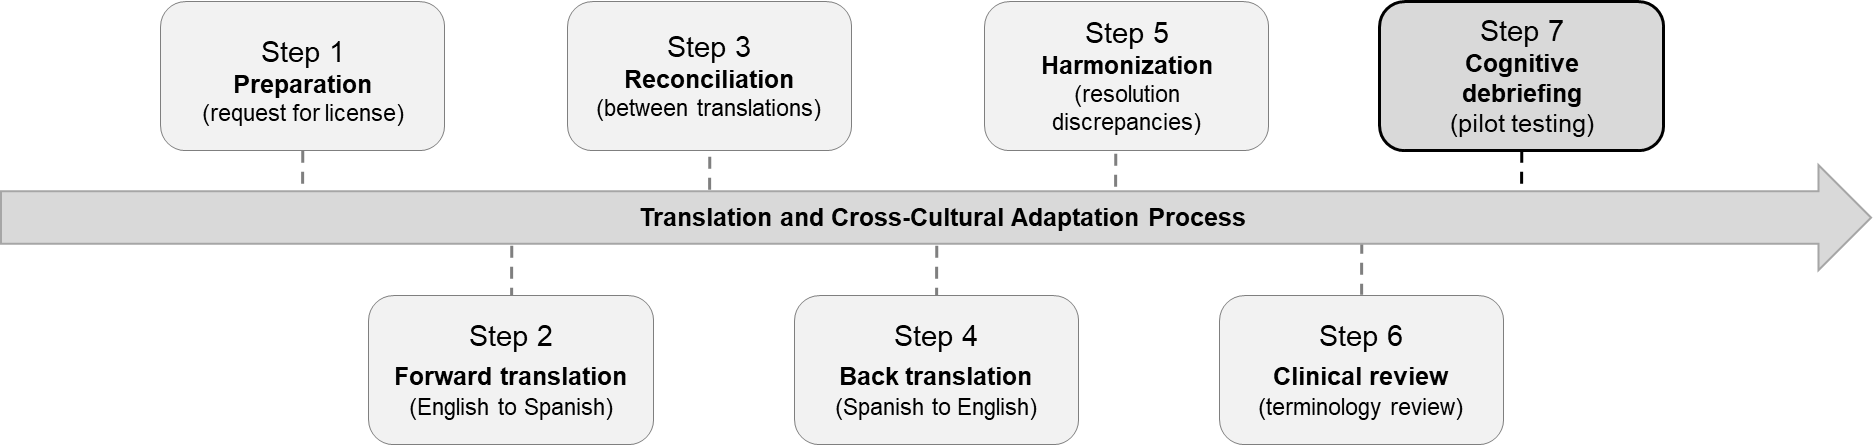


Abbreviations: DCS (Decisional Conflict Scale); ISPOR (International Society for Pharmacoeconomics and Outcomes Research); aWild D, et al. Principles of Good Practice for the Translation and Cultural Adaptation Process for Patient-Reported Outcomes (PRO) Measures: report of the ISPOR Task Force for Translation and Cultural Adaptation. Value Health. 2005;8(2):94-104

Seven steps for the translation and cross-cultural adaptation of DCS into Spanish from Spain (ISPOR): step-1 preparation: permission request to use and translate the original version of the questionnaire to its developer and provider (Ottawa Hospital Research Institute, Ottawa, Canada); step-2, forward translations from English to Spanish by two independent native Spanish linguists; step-3, reconciliation, identification of the discrepancies between the translations and the elaborated Spanish reconciled version by a third Spanish linguist; step-4, back-translation, translation from Spanish into English by a native English linguist unaware of the original version; step-5, harmonization, resolution of any discrepancies between the translation, the back-translation, and the original DCS questionnaire to obtain a harmonized Spanish version by a team of native English and Spanish linguists; step-6, clinical review, revision of the harmonized Spanish version obtained by a clinical expert to verify the accuracy of medical terminology; step-7, cognitive debriefing, and content validation, pilot testing on a group of migraine patients to evaluate questionnaire ease of use and understandability.

**Supplementary Table 1**. Questionnaire for the cross-cultural adaptation of the Decisional Conflict Scale (DCS)

| **Questionnaire for the cross-cultural adaptation of the DCS** |
| --- |
| **Sociodemographic and clinical variables (to be completed by the physician)** |
| **Age**: _______ (date of birth) **Gender**   Male Female |
| **Education level**  Primary education  Secondary education  Professional training  University or higher education |
| **Time since diagnosis (years or months) ________** |
| **DCS (to be completed by the patient)** |
| **Explanatory text for the patient:**  This document presents the DCS, whose objective is to establish the patient's conflict when making a specific medical decision. The questionnaire allows you to establish your knowledge about the treatment options, the values you assign to the options, how the participation of other people in the decision-making process influences you and how satisfactory the decision is for you.  First, please complete the questionnaire, indicating your degree of agreement with each statement, considering the last time the physician and/or you considered a change of treatment or the performance of a diagnostic test.  **Decisional Conflict Scale (Harmonize version):**  Question 1. Conozco las opciones que están disponibles para mí / *I know which options are available to me.*  Question 2. Conozco los beneficios de cada opción / *I know the benefits of each option*  Question 3. Conozco los riesgos y efectos secundarios de cada opción / *I know the risks and side effects of each option.*  Question 4. Tengo claro qué beneficios son los más importantes para mí / *I am clear about which benefits matter most to me*  Question 5. Tengo claro qué riesgos y efectos secundarios son los más importantes / *I am clear about which risks and side effects matter most.*  Question 6. Tengo claro qué es más importante para mí (los beneficios o los riesgos y efectos secundarios). / *I am clear about which is more important to me (the benefits or the risks and side effects).*  Question 7. Tengo suficiente apoyo de otras personas para tomar una decisión. / *I have enough support from others to make a choice.*  Question 8. Tomo esta decisión sin presión por parte de otras personas / *I am choosing without pressure from others*  Question 9. Tengo suficiente asesoramiento para tomar una decisión / *I have enough advice to make a choice.*  Question 10. Tengo claro cuál es la mejor opción para mí / *I am clear about the best choice for me*  Question 11. Estoy seguro/a de qué decidir / *I feel sure about what to choose.*  Question 12. Tomar esta decisión me resulta fácil / *This decision is easy for me to make.*  Question 13. Creo que he tomado una decisión informada / *I feel I have made an informed choice.*  Question 14. Mi decisión muestra lo que es importante para mí / *My decision shows what is important for me*  Question 15. Tengo la intención de mantener mi decision. / *I expect to stick with my decision.*  Question 16. Estoy satisfecho/a con mi decisión. / *I am satisfied with my decision.*  **Answer options for each question**  Strongly agree (0)  Agree (1)  Neither agree nor disagree (2)  Disagree (3)  Strongly disagree (4) |
| **Patient's opinion on the extent and presentation of the DCS** |
| - **How long did it take you to answer the questionnaire? (minutes)** - **How do you feel about the time it took you to answer the questionnaire?** - **Please rate the following aspects of the questionnaire's length and presentation on a scale from 1 to 5, with 1 being the worst and 5 the best option**   Length of the questionnaire:  Not at all appropriate (0)  (1)  (2)  (3)  Very appropriate (4)  Presentation of the questionnaire:  Not at all appropriate (0)  (1)  (2)  (3)  Very appropriate (4)  **Please carefully read the scale on which each question is rated and indicate its meaning for you.**   - Strongly agree ____ - Agree _____ - Neither agree nor disagree ____ - Disagree ____ - Strongly disagree ____ |
| **Patient's opinion on the clarity, understandability, ease of responding and relevance of the questions** |
| **Explanatory text for the patient:**  Please rate the clarity and understandability of the questions, whether you find them easy to answer and whether the question is relevant to determine the degree of the patient's conflict in decision making. Please answer the questions on a scale from 1 to 5, where 1 is equivalent to Not at all and 5 is equivalent to Very much  **Decisional Conflict Scale (Harmonize version):**  Question 1. Conozco las opciones que están disponibles para mí / *I know which options are available to me.*  Question 2. Conozco los beneficios de cada opción / *I know the benefits of each option*  Question 3. Conozco los riesgos y efectos secundarios de cada opción / *I know the risks and side effects of each option*  Question 4. Tengo claro qué beneficios son los más importantes para mí / *I am clear about which benefits matter most to me*  Question 5. Tengo claro qué riesgos y efectos secundarios son los más importantes / *I am clear about which risks and side effects matter most.*  Question 6. Tengo claro qué es más importante para mí (los beneficios o los riesgos y efectos secundarios). / *I am clear about which is more important to me (the benefits or the risks and side effects).*  Question 7. Tengo suficiente apoyo de otras personas para tomar una decisión. / *I have enough support from others to make a choice.*  Question 8. Tomo esta decisión sin presión por parte de otras personas/ *I am choosing without pressure from others*  Question 9. Tengo suficiente asesoramiento para tomar una decisión/ *I have enough advice to make a choice.*  Question 10. Tengo claro cuál es la mejor opción para mí/ *I am clear about the best choice for me*  Question 11. Estoy seguro/a de qué decidir/ *I feel sure about what to choose.*  Question 12. Tomar esta decisión me resulta fácil/ *This decision is easy for me to make.*  Question 13. Creo que he tomado una decisión informada/ *I feel I have made an informed choice*  Question 14. Mi decisión muestra lo que es importante para mí / *My decision shows what is important for me*  Question 15. Tengo la intención de mantener mi decisión/ *I expect to stick with my decision.*  Question 16. Estoy satisfecho/a con mi decisión. / *I am satisfied with my decision.*  **Inquiries for each question**  Explain this statement in your own words ____  Do you understand this question?  Not at all (0)  (1)  (2)  (3)  Very much (4)  Do you find it easy to answer?  Not at all (0)  (1)  (2)  (3)  Very much (4)  Do you think it is relevant to know your conflict in decision-making?  Not at all (0)  (1)  (2)  (3)  Very much (4)  Are the answer options appropriate?  Not at all (0)  (1)  (2)  (3)  Very much (4)  Comments/suggestions: ___ |

**Supplementary Table 2**. Questionnaire for the psychometric properties analysis of the Decisional Conflict Scale (DCS)

| **Questionnaire for the psychometric properties analysis of the DCS** |
| --- |
| **Socio-demographic variables (to be completed by the physician)** |
| **Age**: _______ (date of birth) **Gender**   Male Female |
| **Education level**  Primary education  Secondary education  Professional training  University or higher education |
| **Clinical variables (to be completed by the physician)** |
| **Time since diagnosis (years)________** |
| **Frequency of migraines (days per month):**  Low-frequency episodic (4-7)  High-frequency episodic (8-14) |
| **Number of previous treatment failures:**  No failures  1-2 failures  ≥3 failures |
| **Evaluation of treatment change after consultation:**  No evaluation (patient does not require a change of treatment)  With evaluation (the patient must evaluate together with the physician a change of treatment) |
| **Decision after evaluation of change:**  Same treatment with the same dosage and posology  Same treatment with different dosage or posology  Switching from one treatment to another  Addition of new treatment to the current drug  Discontinuation of current treatment |
| **DCS (to be completed by the patient)** |
| **Explanatory text for the patient:**  Considering the treatment decisions made during your consultation, please read the following statements, and indicate your level of agreement with each of them, from strongly agree (0) to strongly disagree (4).  **Decisional Conflict Scale (Adapted version):**  Question 1. Conozco las opciones que están disponibles para mí / *I know which options are available to me.*  Question 2. Conozco los beneficios de cada opción / *I know the benefits of each option*  Question 3. Conozco los riesgos y efectos secundarios de cada opción / *I know the risks and side effects of each option*  Question 4. Tengo claro qué beneficios son los más importantes para mí / *I am clear about which benefits matter most to me*  Question 5. Tengo claro qué riesgos y efectos secundarios son los más importantes / *I am clear about which risks and side effects matter most.*  Question 6. Tengo claro qué es más importante para mí (los beneficios o los riesgos y efectos secundarios). / *I am clear about which is more important to me (the benefits or the risks and side effects).*  Question 7. Tengo suficiente apoyo de otras personas para tomar una decisión. / *I have enough support from others to make a choice.*  Question 8. Tomo esta decisión sin presión por parte de otras personas/ *I am choosing without pressure from others*  Question 9. Tengo suficiente asesoramiento para tomar una decisión/ *I have enough advice to make a choice.*  Question 10. Tengo claro cuál es la mejor opción para mí/ *I am clear about the best choice for me*  Question 11. Estoy seguro/a de qué decidir/ *I feel sure about what to choose.*  Question 12. Tomar esta decisión me resulta fácil/ *This decision is easy for me to make.*  Question 13. Creo que he tomado una decisión informada/ *I feel I have made an informed choice*  Question 14. Mi decisión refleja los aspectos del tratamiento que más me importan mí / *My decision reflects the treatment aspects that matter most to me.*  Question 15. Tengo la intención de mantener mi decisión/ *I expect to stick with my decision.*  Question 16. Estoy satisfecho/a con mi decisión. / *I am satisfied with my decision.*  **Answer options for each question**  Strongly agree (0)  Agree (1)  Neither agree nor disagree (2)  Disagree (3)  Strongly disagree (4) |
| **9-item Shared Decision-Making (SDM-Q-9) (to be completed by the patient)** |
| **Explanatory text for the patient:**  The following statements are related to the treatment decision-making process you have undergone with your physician in the consultation. Please indicate your level of agreement or disagreement with these statements, ranging from strongly disagree (0) to strongly agree (5).  **SDM-Q-9 questions:**  Question 1. Mi médico me dijo expresamente que debía tomarse una decision / *My doctor made clear that a decision needs to be made.*  Question 2. Mi médico quería saber exactamente cómo me gustaría participar en la toma de decisions / *My doctor wanted to know exactly how I want to be involved in making the decision.*  Question 3. Mi médico me informó de que existen distintas opciones de tratamiento para mi problema de salud / *My doctor told me that there are different options for treating my medical condition*  Question 4. Mi médico me explicó con exactitud las ventajas y desventajas de las distintas opciones de tratamiento / *My doctor precisely explained the advantages and disadvantages of the treatment options*  Question 5. Mi médico me ayudó a entender toda la información / *My doctor helped me understand all the information.*  Question 6. Mi médico me preguntó qué opción de tratamiento prefiero / *My doctor asked me which treatment option I prefer.*  Question 7. Mi médico y yo valoramos con detenimiento las distintas opciones de tratamiento / *My doctor and I thoroughly weighed the different treatment options.*  Question 8. Mi médico y yo elegimos juntos una opción de tratamiento / *My doctor and I selected a treatment option together.*  Question 9. Mi médico y yo llegamos a un acuerdo sobre el modo de proceder / *My doctor and I reached an agreement on how to proceed.*  **Answer options for each question**  Strongly disagree (0)  disagree (1)  Slightly disagree (2)  Slightly agree (3)  agree (4)  Strongly agree (5) |
| **Decision Self-Efficacy Scale (DSES) (to be completed by the patient)** |
| **Explanatory text for the patient:**  Listed below are a series of actions related to making an informed treatment decision. Please indicate your level of confidence in performing each action, from Not at all confident (0) to Very confident (4).  **I have confidence that I can:**  Question 1. Obtener la información sobre las opciones de tratamiento disponibles para mi / *Get the facts about the medication choices available to me*  Question 2. Obtener la información sobre los beneficios de cada opción de tratamiento / *Get the facts about the benefits of each choice*  Question 3. Obtener la información sobre los riesgos y efectos secundarios de cada opción de tratamiento / *Get the facts about the risks and side effects of each choice*  Question 4. Comprender la información lo suficiente para tomar una decisión / *Understand the information enough to be able to make a choice*  Question 5. Preguntar sin sentirme tonto / *Ask questions without feeling dumb*  Question 6. Expresar mis preocupaciones sobre cada opción de tratamiento / *Express my concerns about each choice*  Question 7. Buscar consejo / *Ask for advice*  Question 8. Encontrar la opción que más se adapta a mi persona / *Figure out the choice that best suits me*  Question 9. Manejar la presión de terceras personas cuando tomo mi decision / *Handle unwanted pressure from others in making my choice* Question 10. Expresar mi decisión al personal de salud que me atiende / *Let the clinic team know what’s best for me*  Question 11. Retrasar mi decisión si considero que necesito más tiempo para decidir */ Delay my decision if I feel I need more time*  **Answer options for each question**  Not at all confident (0)  Not very confident (1)  Somewhat confident (2)  Fairly confident (3)  Very confident (4) |

**Supplementary** **Table 3**. Interpretation of Spearman's correlation coefficient

| **Interpretation of Spearman's correlation coefficient** | |
| --- | --- |
| **Correlation coefficient** | **Interpretation** |
| 0 | No correlation |
| 0.01 – 0.19 | Very low correlation |
| 0.2 – 0.39 | Low correlation |
| 0.4 – 0.69 | Moderate correlation |
| 0.7 – 0.89 | High correlation |
| 0.9 – 0.99 | Very high correlation |
| 1 | Perfect correlation |
|  | |

**Note**: Data from Spearman’s correlation. Available from: http://www.statstutor.ac.uk/resources/uploaded/spearmans.pdf. Accessed December 06, 2022.1

**Supplementary** **Table 4**. Version of the DCS after harmonization and cross-cultural validation in Spanish migraine patients from Spain (English version in italics).

| **MI DIFICULTAD PARA TOMAR ESTA DECISIÓN**  **Teniendo en cuenta la opción que prefiere, responda las siguientes preguntas**  ***MY DIFFICULTY IN MAKING THIS CHOICE***  ***Considering the option you prefer, please answer the following questions*** | | | | | |
| --- | --- | --- | --- | --- | --- |
|  | **Completamente de acuerdo / *Strongly agree* (1)** | **De acuerdo / *Agree* (2)** | **Ni de acuerdo ni en desacuerdo / *Neither agree or disagree* (3)** | **En desacuerdo / *Disagree* (4)** | **Completamente en desacuerdo / *Strongly disagree* (5)** |
| 1. Conozco las opciones que están disponibles para mí.   *I know which options are available to me*. |  |  |  |  |  |
| 1. Conozco los beneficios de cada opción.   *I know the benefits of each option.* |  |  |  |  |  |
| 1. Conozco los riesgos y efectos secundarios de cada opción.   *I know the risks and side effects of each option.* |  |  |  |  |  |
| 1. Tengo claro qué beneficios son los más importantes para mí.   *I am clear about which benefits matter most to me.* |  |  |  |  |  |
| 1. Tengo claro qué riesgos y efectos secundarios son los más importantes.   *I am clear about which risks and side effects matter most*. |  |  |  |  |  |
| 1. Tengo claro qué es más importante para mí (los beneficios o los riesgos y efectos secundarios).   *I am clear about which is more important to me (the benefits or the risks and side effects).* |  |  |  |  |  |
| 1. Tengo suficiente apoyo de otras personas para tomar una decisión.   *I have enough support from others to make a choice.* |  |  |  |  |  |
| 1. Tomo esta decisión sin presión por parte de otras personas.   *I am choosing without pressure from others.* |  |  |  |  |  |
| 1. Tengo suficiente asesoramiento para tomar una decisión.   *I have enough advice to make a choice.* |  |  |  |  |  |
| 1. Tengo claro cuál es la mejor opción para mí.   *I am clear about the best choice for me.* |  |  |  |  |  |
| 1. Estoy seguro/a de qué decidir.   *I feel sure about what to choose.* |  |  |  |  |  |
| 1. Tomar esta decisión me resulta fácil.   *This decision is easy for me to make.* |  |  |  |  |  |
| 1. Creo que he tomado una decisión informada.   *I feel I have made an informed choice.* |  |  |  |  |  |
| 1. Mi decisión refleja los aspectos del tratamiento que más   me importan  *My decision reflects the treatment aspects that matter most to me.* |  |  |  |  |  |
| 1. Tengo la intención de mantener mi decisión.   *I expect to stick with my decision.* |  |  |  |  |  |
| 1. Estoy satisfecho/a con mi decisión.   *I am satisfied with my decision.* |  |  |  |  |  |
|  | | | | | |

**Supplementary Table 5.** Average scores of the whole patients’ sample (n=145) in the study questionnaires

| Questionnaire | Mean | SD | Min | P25 | P50 | P75 | Max | N |
| --- | --- | --- | --- | --- | --- | --- | --- | --- |
| DCS | 31.9 | 29.7 | 0.0 | 12.5 | 23.4 | 32.8 | 100.0 | 145 |
| DCS: Feeling informed | 6.2 | 5.7 | 0.0 | 1.6 | 4.7 | 7.8 | 18.8 | 145 |
| DCS: Clarity related to personal values | 6.1 | 5.7 | 0.0 | 1.6 | 4.7 | 7.8 | 18.8 | 145 |
| DCS: Feeling supported | 5.6 | 5.8 | 0.0 | 1.6 | 4.7 | 6.3 | 18.8 | 145 |
| DCS: Uncertainty | 6.5 | 5.3 | 0.0 | 3.1 | 4.7 | 7.8 | 18.8 | 145 |
| DCS: Effective decision-making | 7.4 | 8.2 | 0.0 | 1.6 | 6.3 | 7.8 | 25.0 | 145 |
| SDMQ9 | 81.0 | 14.3 | 27.3 | 72.7 | 81.8 | 93.2 | 100.0 | 145 |
| DSES | 80.4 | 18.7 | 0.0 | 77.8 | 84.4 | 93.3 | 100.0 | 145 |

Abbreviations: DSES (Self-Confidence in Decision-Making Skills); DCS (Decisional Conflict Scale); SD (standard deviation); SDMQ-9 (9-item Shared Decision-Making)

**Supplementary Figure 2**. Distribution of patients’ scores for DCS and DSES questionnaires (A) and DCS and SDMQ9 questionnaires (B)


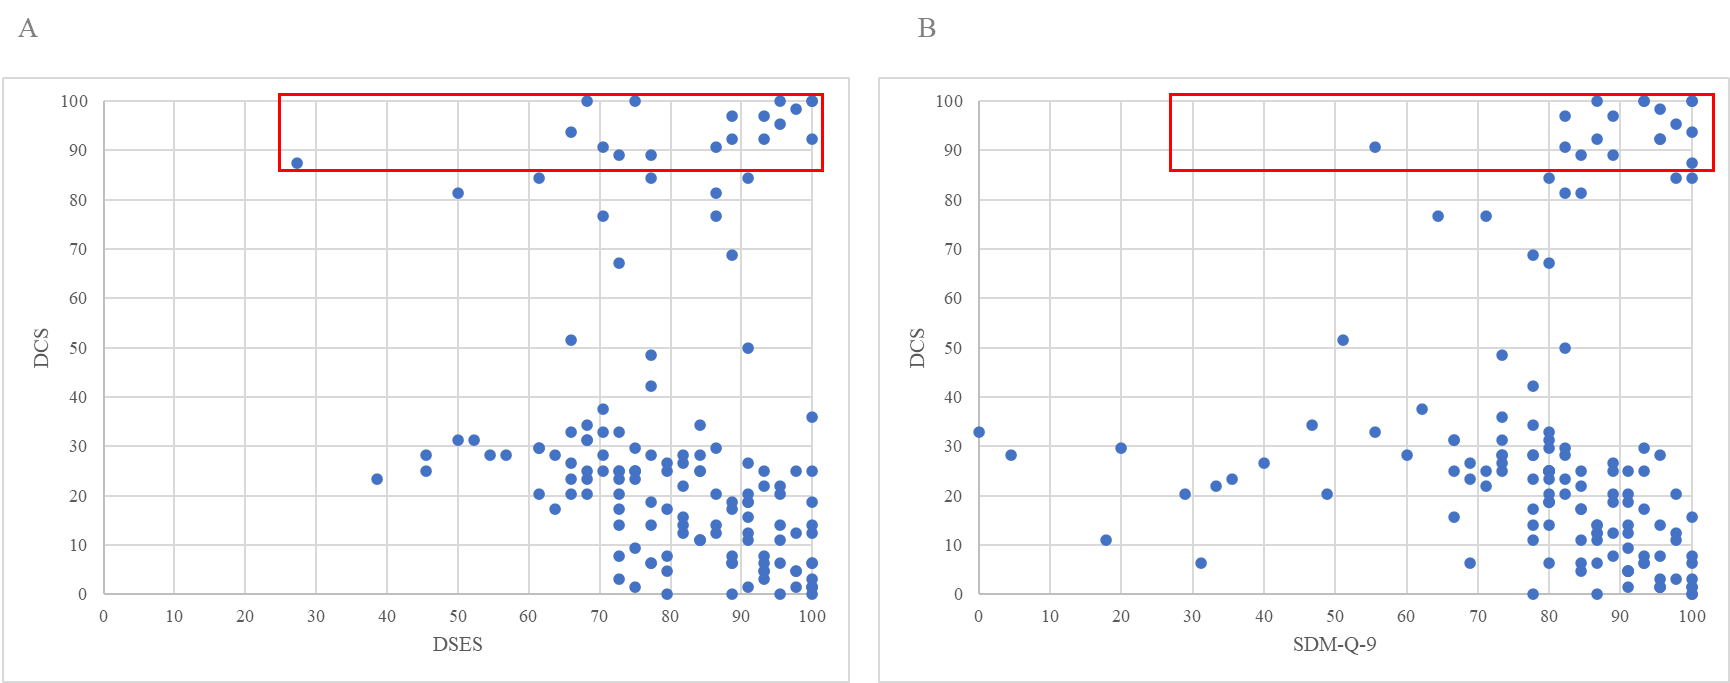


The red squares include the patients’ scores that do not conform to the expected inverse correlation between the DCS and DSES questionnaires (A) and the DCS and SDMQ9

questionnaires (B); Abbreviations: DSES (Self-Confidence in Decision-Making Skills); DCS (Decisional Conflict Scale); SD (standard deviation); SDMQ-9 (9-item Shared Decision-Making)

**Supplementary** **Table 6**. Sociodemographic, clinical characteristics, and questionnaire’s scores of excluded patients (n=17) and the whole population (n=145)

| **Sociodemographic, clinical characteristics, and questionnaire scores** | | |
| --- | --- | --- |
| **Variables** | **Outliers* (n=17)** | **Population (N =145)** |
| Age (years), mean ± SD | 31.1 ±10.5 | 38.1 ±12.4 |
| Gender (female), % | 88.2% | 86.9% |
| Education level, % |  |  |
| Primary education | 11.8% | 7.6% |
| Secondary education | 23.5% | 24.1% |
| Professional training | 35.3% | 24.1% |
| University or higher education | 29.4% | 44.1% |
| Time since diagnosis (years). mean ±SD | 7.9 ±8.5 | 13.6 ±13.4 |
| Frequency of migraines (DPM). % |  |  |
| Low-frequency episodic (4-7) | 52.9% | 40.7% |
| High-frequency episodic (8-14) | 17.6% | 30.3% |
| Chronic (≥15) | 29.4% | 29.0% |
| Number of previous treatment failures. % |  |  |
| No failures | 41.2% | 49.0% |
| 1-2 failures | 23.5% | 31.7% |
| ≥3 failures | 35.3% | 19.3% |
| Decision after evaluation of change. % |  |  |
| Same treatment with the same dosage and posology | 0.0% | 0.7% |
| Same treatment with different dosage or posology | 0.0% | 5.5% |
| Switching from one treatment to another | 35.3% | 24.1% |
| Addition of new treatment to the current drug | 64.7% | 63.4% |
| Discontinuation of current treatment | 0.0% | 6.2% |
| Questionnaires. mean ±SD |  |  |
| DCS | 93.1 ± 6.1 | 31.9 ± 29.7 |
| SDM-Q-9 | 90.3 ± 6.5 | 81.0 ± 14.3 |
| DSES | 88.4 ± 10.1 | 80.4 ± 18.7 |
|  | |  |

Abbreviations: DSES (Self-Confidence in Decision-Making Skills); DCS (Decisional Conflict Scale); SD (standard deviation); SDMQ-9 (9-item Shared Decision-Making); *patients whose scores do not conform to the expected inverse correlation between the DCS. DSES and the SDMQ

REFERENCES

1. Spearman’s correlation. Available from: <http://www.statstutor.ac.uk/resources/uploaded/spearmans.pdf>. Accessed December 06, 2022.
